# Supplementary material for: Germanium sulfide nanosheet: a universal anode material for alkali metal ion batteries
Source: Royal Society of Chemistry journal article supplement (doi:10.1039/c6ta03210a), 2016-01-01
Supplement: c6ta03210a1.pdf [file c6ta03210a1.pdf]

## SUPPLEMENTARY INFORMATION

### Germanium sulfide nanosheet: A universal anode material for alkali metal ion batteries

Feng Li,<sup>ab</sup> Yuanyuan Qu,<sup>a</sup> Mingwen Zhao<sup>\*a</sup>

<sup>a</sup>*School of Physics and State Key Laboratory of Crystal Materials, Shandong University, Jinan, 250100, Shandong, China.*

<sup>b</sup>*School of Physics and Technology, University of Jinan, Jinan, 250022, Shandong, China.*

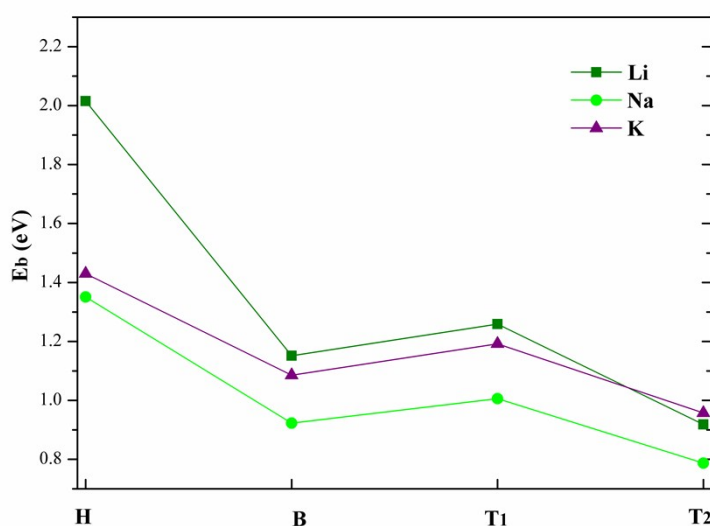

**Figure S1.** The binding energy profile for AM atom adsorbed germanium sulfide nanosheet (GSNS) on four possible adsorption sites.

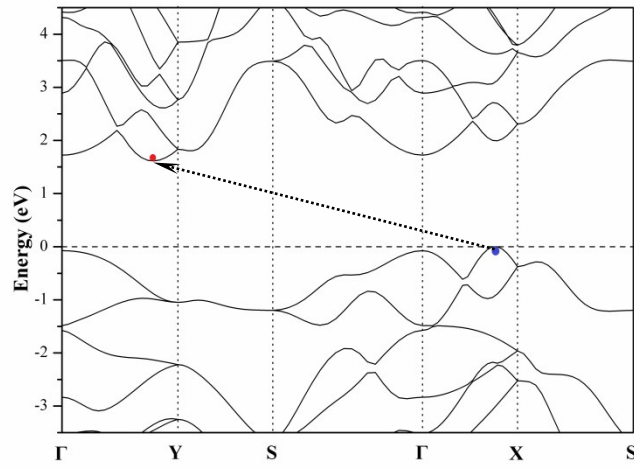

**Figure S2.** The calculated band structure of the primitive GSNS. The valance band maximum is set to zero, The VBM and CBM are marked by blue and red circles, respectively.

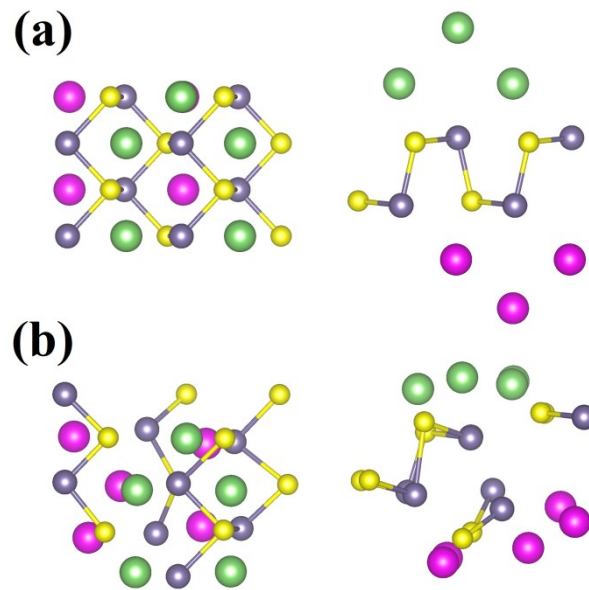

**Figure S3.** (a) and (b) are initial and relaxed geometries of 10Li atoms adsorbed on the GSNS (2×2), respectively. Left panel: top view; Right panel: side view. Li atoms above and below the GSNS are shown as light green and pink, respectively.
